# Supplementary material
Source: HighWire-hosted journal article supplement (https://erj.ersjournals.com/content/59/6/2200018)
Supplement: inline-supplementary-material-1 [file inline-supplementary-material-1.pdf]

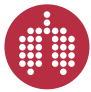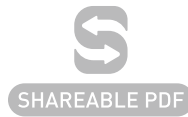

# Nontuberculous mycobacterial pulmonary disease incidence among elderly patients with bronchiectasis

Kimberly Schildknecht<sup>1</sup>, Kevin L. Winthrop<sup>1</sup>, D. Rebecca Prevots <sup>2</sup>, Rebekah Blakney<sup>2</sup> and Emily Henkle <sup>1</sup>

<sup>1</sup>Oregon Health & Science University-Portland State University School of Public Health (OHSU-PSU), Portland, OR, USA. <sup>2</sup>National Institutes of Health, Bethesda, MD, USA.

Corresponding author: Kimberly Schildknecht ([kschildknecht@gmail.com](mailto:kschildknecht@gmail.com))

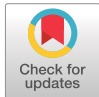

Shareable abstract (@ERSpublications)

**Incidence of NTM-PD was estimated among US Medicare beneficiaries newly diagnosed with bronchiectasis between 2006 and 2014. Overall incidence of NTM-PD was found to be as high as 1950 per 100 000 person-years.** <https://bit.ly/3iAr4o5>

**Cite this article as:** Schildknecht K, Winthrop KL, Prevots DR, *et al.* Nontuberculous mycobacterial pulmonary disease incidence among elderly patients with bronchiectasis. *Eur Respir J* 2022; 59: 2200018 [DOI: 10.1183/13993003.00018-2022].

This single-page version can be shared freely online.

The content of this work is not subject to copyright. Design and branding are copyright ©ERS 2022. For commercial reproduction rights and permissions contact [permissions@ersnet.org](mailto:permissions@ersnet.org)

Received: 4 Jan 2022  
Accepted: 17 March 2022

## To the Editor:

Nontuberculous mycobacteria (NTM) are environmental pathogens causing disease in humans; however, not everyone exposed develops disease [1]. Those with underlying pulmonary diseases, persons over 60 years old and women have an increased risk for nontuberculous mycobacterial pulmonary disease (NTM-PD) [1, 2]. Bronchiectasis is a lung condition characterised by chronic airway dilation and inflammation, resulting in impaired mucus clearance, and is associated with NTM-PD [1–3]. Both NTM-PD and bronchiectasis are increasing in incidence in the USA [2, 3]. Although patients with bronchiectasis are at increased risk of acquiring NTM-PD [1, 2], the incidence of NTM-PD in these patients is not well described. Previous US Medicare data estimated those with bronchiectasis were 50- to 75-fold more likely to have a diagnosis of NTM-PD than those without bronchiectasis [4]. The objective of this analysis was to estimate the incidence of NTM-PD among US Medicare enrollees newly diagnosed with bronchiectasis over the age of 65 years.
